# Supplementary figures and images for: Paradox: Curcumin, a Natural Antioxidant, Suppresses Osteosarcoma Cells via Excessive Reactive Oxygen Species
Source: MDPI journal article supplement (doi:10.3390/ijms241511975), 2023-07-26

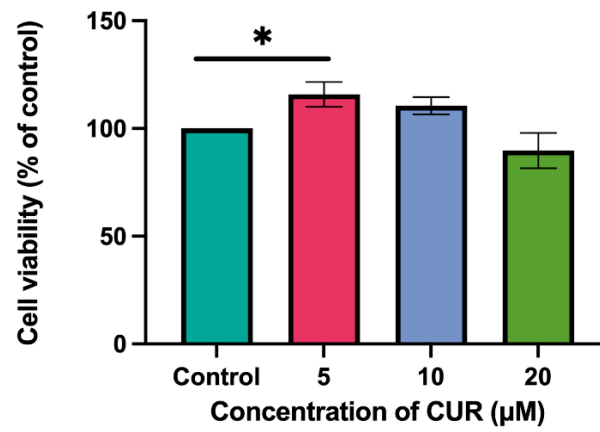

**Figure S1.** Viability of dental pulp stem cells treated by curcumin for 48 h.  $n = 3$  in each group, \*:  $p < 0.05$ .

Supplement: s1 [file s1]
